# Supplementary material for: Favorable Modifiable Cardiovascular Risk Profile Is Associated With Lower Healthcare Costs Among Cancer Patients: The 2012–2013 Medical Expenditure Panel Survey
Source: PubMed Central journal article supplement — J Am Heart Assoc. 2018 Apr 23;7(9):e007874. doi: 10.1161/JAHA.117.007874 (PMC6015292; doi:10.1161/jaha.117.007874), 2018-04-23
Supplement: JAH3-7-e007874-s001.pdf [file JAH3-7-e007874-s001.pdf]

# **SUPPLEMENTAL MATERIAL**

**Table S1. ICD-9-CM codes, MEPS 2012-2013.**

| <b>Diagnosis</b>                                | <b>ICD-9-CM</b> |
|-------------------------------------------------|-----------------|
| ASCVD                                           |                 |
| Acute Myocardial Infarction                     | 410             |
| Angina Pectoris                                 | 413             |
| Other Chronic Ischemic Heart Disease            | 414             |
| Cerebrovascular Disease                         |                 |
| Precerebral Artery Occlusion                    | 433             |
| Cerebral Artery Occlusion                       | 434             |
| Transient Cerebral Ischemia                     | 435             |
| Acute, But Ill-Defined, Cerebrovascular Disease | 436             |
| Other And Ill-Defined Cerebrovascular Disease   | 437             |
| CRF                                             |                 |
| Hypertension                                    | 401             |
| Diabetes Mellitus                               | 250             |
| Disorders Of Lipoid Metabolism                  | 272             |
|                                                 |                 |
| <b>Diagnosis</b>                                | <b>CCS</b>      |
| Cancer                                          | 11 - 44         |

ICD-9-CM, International Classification of Diseases, 9<sup>th</sup> Edition, Clinical Modification; ASCVD, atherosclerotic cardiovascular disease; CRF, cardiovascular risk factor; CCS, clinical classification software diagnoses.
